# Supplementary material for: Malaria and COVID-19 coinfection in a non-malaria-endemic area in Brazil
Source: PubMed Central journal article supplement (PMC10204151; doi:10.1590/0037-8682-0598-2022), 2023-05-22
Supplement: 1678-9849-rsbmt-56-e0598-2022-supp2.pdf [file 1678-9849-rsbmt-56-e0598-2022-supp2.pdf]

## SUPPLEMENTARY INFORMATION 2

### Materials and Methods

#### Quantification of soluble markers in the plasma

The concentrations of the following soluble markers (CCL2/MCP-1, CCL3/MIP-1 $\alpha$ , CCL4/MIP-1 $\beta$ , CXCL8/IL-8, CXCL10/IP-10, EGF, Eotaxin, G-CSF, GM-CSF, IFN- $\alpha$ 2, IFN- $\gamma$ , IL-10, IL-12P40, IL-12P70, IL-13, IL-15, L-17A, IL-1RA, IL-1 $\alpha$ , IL-1 $\beta$ , IL-2, IL-3, IL-4, IL-5, IL-6, IL-7, TNF- $\alpha$ , TNF- $\beta$ , VEGF) in plasma (kept frozen at  $-80^{\circ}\text{C}$ ) were measured using MILLIPLEX MAP Human Cytokine/Chemokine

Magnetic Bead Panel 29-Plex (Merck Millipore, USA), following the manufacturer's instructions.

#### Canonical pathway enrichment analysis

IPA software was used for enrichment analysis to identify relevant biological canonical pathways (QIAGEN Inc., <https://www.qiagenbioinformatics.com/products/ingenuity-pathway-analysis>). Briefly, the canonical pathway enrichment analysis p-value calculation was based on the reference set of 29 measured cytokines, and a cutoff  $>10$ -fold change was considered statistically significant.
